# Supplementary material for: A pancreatic ductal adenocarcinoma subpopulation is sensitive to FK866, an inhibitor of NAMPT
Source: PubMed Central journal article supplement (PMC5288221; doi:10.18632/oncotarget.10776), 2016-07-22
Supplement: oncotarget-07-53783-s001.pdf [file oncotarget-07-53783-s001.pdf]

## A pancreatic ductal adenocarcinoma subpopulation is sensitive to FK866, an inhibitor of NAMPT

### SUPPLEMENTARY FIGURE

### Doubling Times for PCC

| Patient | Doubling time | Standard Deviation |
|---------|---------------|--------------------|
| L-IPC   | 16.46         | 5.33               |
| 01.033  | 17.75         | 5.7                |
| Foie-8B | 20.53         | 3.84               |
| 01.001  | 26.18         | 3.34               |
| 01.004  | 26.34         | 6.61               |
| AH-IPC  | 27.12         | 5.13               |
| AD-IPC  | 27.59         | 8.88               |
| B-Tim   | 28.05         | 1.64               |
| C-NOR   | 28.53         | 6.29               |
| J-IPC   | 29.39         | 4.32               |
| HN-03   | 29.51         | 0.68               |
| E-NOR   | 29.69         | 10.82              |
| L-NOR   | 30.34         | 4.09               |
| H-NOR   | 31.37         | 1.84               |
| A-NOR   | 33.03         | 5.79               |
| AO-IPC  | 33.33         | 2.58               |
| 01.030  | 33.54         | 3.19               |
| HN-14   | 34.39         | 10.42              |
| HN-01   | 40.3          | 2.86               |
| 01.048f | 41.94         | 7.08               |
| AR-IPC  | 42.77         | 11.92              |
| 02.058  | 43.55         | 2.21               |
| 02.087p | 44.63         | 6.07               |

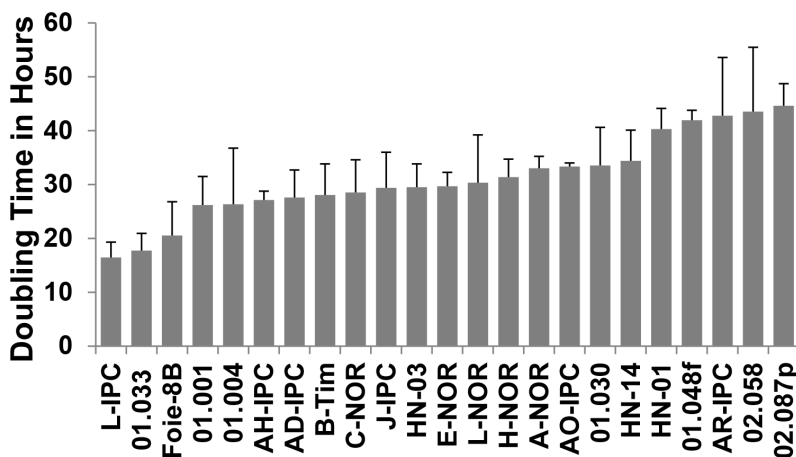

**Supplementary Figure 1: Doubling Times for Primary cell Cultures (PCC).** 5,000 primary cultured cells from each patient were quantified with PrestoBlue 24h after plating on a 96 well plate and after 3 days. These values were used to calculate the replication time every 24h.
